# Supplementary material
Source: Springer Nature journal article supplement (https://www.springermedizin.de/resource/supplementary/12913_2008_838_MOESM7_ESM.pdf/9535694)
Supplement: MOESM7 [file 9535694]

| Disease:<br>Intervention:<br>Setting: |                          | Study:                                                                                                                                                                                                                                                                                                                                                                                                                                           |           | Completeness and consistency of reporting economic evaluation                                                                                                        |    |                            |                                                                                                                                                                                                                                                                                        | Relevance and validity of economic evaluation                                                                                                                                                                                                                                                                                           |           |                                                                                                                                                                       |  |
|---------------------------------------|--------------------------|--------------------------------------------------------------------------------------------------------------------------------------------------------------------------------------------------------------------------------------------------------------------------------------------------------------------------------------------------------------------------------------------------------------------------------------------------|-----------|----------------------------------------------------------------------------------------------------------------------------------------------------------------------|----|----------------------------|----------------------------------------------------------------------------------------------------------------------------------------------------------------------------------------------------------------------------------------------------------------------------------------|-----------------------------------------------------------------------------------------------------------------------------------------------------------------------------------------------------------------------------------------------------------------------------------------------------------------------------------------|-----------|-----------------------------------------------------------------------------------------------------------------------------------------------------------------------|--|
| Type of evidence                      |                          | Question                                                                                                                                                                                                                                                                                                                                                                                                                                         | Rationale | Score                                                                                                                                                                |    | Type of evidence           |                                                                                                                                                                                                                                                                                        | Question                                                                                                                                                                                                                                                                                                                                | Rationale | Score                                                                                                                                                                 |  |
| <b>Economic evaluation</b>            |                          | Are all the dimensions of the economic evaluation reported? Is the reporting complete and transparent? Are estimates used in analysis in agreement with clinical literature/data? Are estimates used consistent with sources? Is information consistent across sections of study report/publication (abstract, methods, results, discussion)? COMPLETE SECTION BELOW                                                                             |           | 1 <input type="checkbox"/> Many gaps/ inconsistent<br>2 <input type="checkbox"/><br>3 <input type="checkbox"/><br>4 <input type="checkbox"/> Complete and consistent |    | <b>Economic evaluation</b> |                                                                                                                                                                                                                                                                                        | Is the study question relevant (choice of comparator, time horizon, patient population, outcome, perspective)? Is the design appropriate? (how close to real disease progression, costs included, strength of assumptions, sensitivity analyses, quality of sources [clinical, costs, epidemiology, utilities])? COMPLETE SECTION BELOW |           | 1 <input type="checkbox"/> Low relevance/ validity<br>2 <input type="checkbox"/><br>3 <input type="checkbox"/><br>4 <input type="checkbox"/> High relevance/ validity |  |
|                                       | Dimension                | Question                                                                                                                                                                                                                                                                                                                                                                                                                                         | Comment   |                                                                                                                                                                      |    | Dimension                  | Question                                                                                                                                                                                                                                                                               | Comment                                                                                                                                                                                                                                                                                                                                 |           |                                                                                                                                                                       |  |
| 1                                     | Target population        | Is the target population for this intervention defined?                                                                                                                                                                                                                                                                                                                                                                                          |           |                                                                                                                                                                      | 1  | Target population          | Is the target population relevant (age, gender, disease stage, co-morbidities, etc...)? Is it comparable to the trial/study population in which efficacy/effectiveness data was obtained? Does it correspond to the actual population in which the treatment is envisioned to be used? |                                                                                                                                                                                                                                                                                                                                         |           |                                                                                                                                                                       |  |
| 2                                     | Intervention and setting | Are intervention & setting described (dose, duration, mode of delivery, hospital specialist, etc)?                                                                                                                                                                                                                                                                                                                                               |           |                                                                                                                                                                      | 2  | Intervention and setting   | Are assumptions/design regarding interventions (dose and duration, mode of delivery) & setting (hospital/community, country, etc) valid with respect to the indication/proposed coverage & clinical context?                                                                           |                                                                                                                                                                                                                                                                                                                                         |           |                                                                                                                                                                       |  |
| 3                                     | Model & event pathway    | Is the model described (model diagram/figure preferred), with details of the event pathway & attribution of costs to each node/part/arm/option/branch of the model?                                                                                                                                                                                                                                                                              |           |                                                                                                                                                                      | 3  | Event pathway              | Does the model reflect a realistic event pathway according to current knowledge?                                                                                                                                                                                                       |                                                                                                                                                                                                                                                                                                                                         |           |                                                                                                                                                                       |  |
| 4                                     | Comparator               | Are comparators described? Is the rationale for comparator selection stated?                                                                                                                                                                                                                                                                                                                                                                     |           |                                                                                                                                                                      | 4  | Comparator                 | Does the choice of comparators reflect current practice?                                                                                                                                                                                                                               |                                                                                                                                                                                                                                                                                                                                         |           |                                                                                                                                                                       |  |
| 5                                     | Perspective              | Are the perspective of analysis and its rationale stated?                                                                                                                                                                                                                                                                                                                                                                                        |           |                                                                                                                                                                      | 5  | Perspective and costs      | Is the perspective chosen valid? Are all relevant costs considered (intervention, healthcare professional visits & procedures, hospitalization, long-term care, lab tests)? Are assumptions for cost selection valid?                                                                  |                                                                                                                                                                                                                                                                                                                                         |           |                                                                                                                                                                       |  |
| 6                                     | Type of analysis         | Is the type of analysis stated? Is the rationale for outcomes selection (effectiveness measure or utilities) stated?                                                                                                                                                                                                                                                                                                                             |           |                                                                                                                                                                      | 6  | Outcome measures           | Are the selected outcomes measures (efficacy, safety and patient reported outcomes [PRO]) relevant? Are the primary efficacy/effectiveness measures used, and major side effects included? Are instruments to estimate PRO valid? Are assumptions for outcomes selection valid?        |                                                                                                                                                                                                                                                                                                                                         |           |                                                                                                                                                                       |  |
| 7                                     | Parameters and estimates | Are all the parameters used in the model (effectiveness data, adverse-event data, resource use, unit costs, health states, utilities) and their sources reported? Are the methodologies to obtain parameter estimates described (e.g., does it include currency conversion, inflation adjustments, calculation of transition probabilities, expert panel data, etc...)? Are all assumptions listed? Are estimates consistent with sources cited? |           |                                                                                                                                                                      | 7  | Parameter estimates        | Are the sources and methods used to estimate the parameters solid (effectiveness data, adverse event probabilities, health states, PRO, utilities, resource use, unit costs)? Are assumptions valid?                                                                                   |                                                                                                                                                                                                                                                                                                                                         |           |                                                                                                                                                                       |  |
| 8                                     | Time horizon             | Is the time horizon reported?                                                                                                                                                                                                                                                                                                                                                                                                                    |           |                                                                                                                                                                      | 8  | Time horizon               | Is time horizon long enough to capture all meaningful differences in costs and outcomes between the intervention and comparator? Are assumptions used valid?                                                                                                                           |                                                                                                                                                                                                                                                                                                                                         |           |                                                                                                                                                                       |  |
| 9                                     | Discount rate            | Is the discount rate reported?                                                                                                                                                                                                                                                                                                                                                                                                                   |           |                                                                                                                                                                      | 9  | Discount rate              | Is the recommended discount rate applied?                                                                                                                                                                                                                                              |                                                                                                                                                                                                                                                                                                                                         |           |                                                                                                                                                                       |  |
| 10                                    | Sensitivity analyses     | Are sensitivity analyses reported? Are rationales for selection of parameters and ranges used in sensitivity analyses reported?                                                                                                                                                                                                                                                                                                                  |           |                                                                                                                                                                      | 10 | Sensitivity analyses       | Do sensitivity analyses cover the most critical parameters within a valid range?                                                                                                                                                                                                       |                                                                                                                                                                                                                                                                                                                                         |           |                                                                                                                                                                       |  |
| 11                                    | Results                  | Are disaggregated results reported (cost & effectiveness per component, direct and indirect costs, total costs and effectiveness, incremental costs and effectiveness, and incremental cost-effectiveness ratios)?                                                                                                                                                                                                                               |           |                                                                                                                                                                      | 11 | Conclusion                 | Are conclusions supported by results?                                                                                                                                                                                                                                                  |                                                                                                                                                                                                                                                                                                                                         |           |                                                                                                                                                                       |  |
